# Supplementary material for: The Microbiota of Modified-Atmosphere-Packaged Cooked Charcuterie Products throughout Their Shelf-Life Period, as Revealed by a Complementary Combination of Culture-Dependent and Culture-Independent Analysis
Source: MDPI journal article supplement (doi:10.3390/microorganisms9061223), 2021-06-04
Supplement: s1 [file s1]

**Supplemental material.**

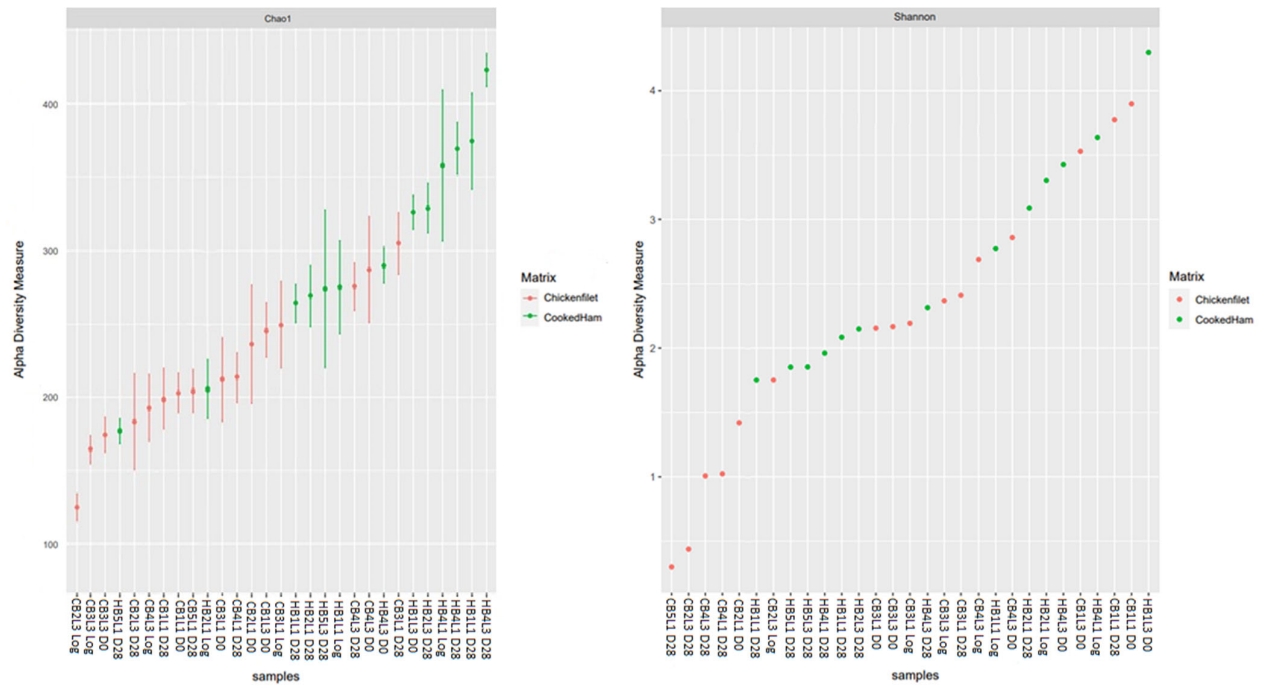

Figure S3: Chao1 and Shannon-Wiener diversity richness indices. These indices represent the alpha diversity of taxa within the samples. When a sample has a high alpha diversity, it means many different organisms are present in the sample.
