# Supplementary material for: The Microbiota of Modified-Atmosphere-Packaged Cooked Charcuterie Products throughout Their Shelf-Life Period, as Revealed by a Complementary Combination of Culture-Dependent and Culture-Independent Analysis
Source: MDPI journal article supplement (doi:10.3390/microorganisms9061223), 2021-06-04
Supplement: s1 [file s1]

Supplemental material.

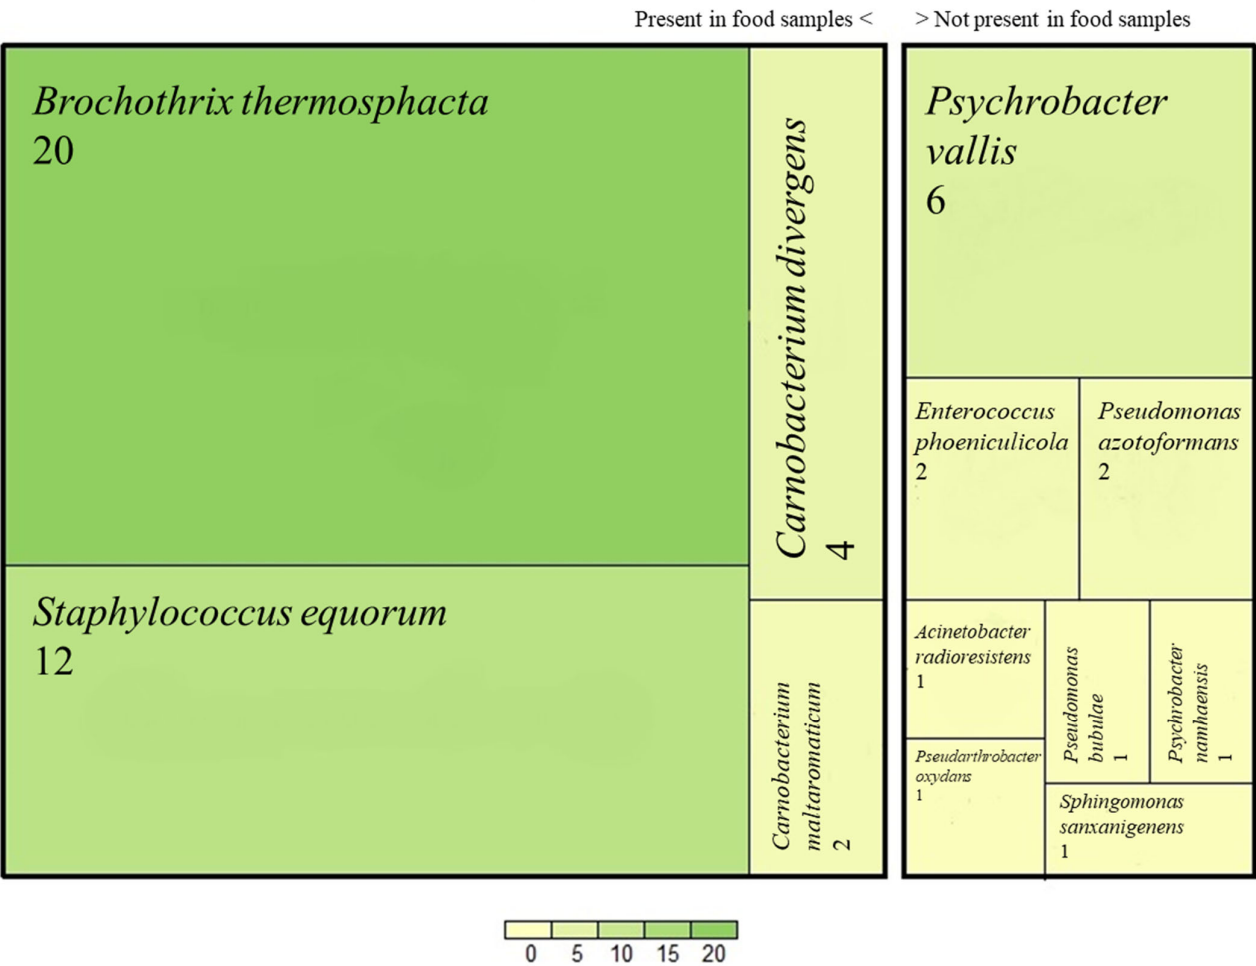

Figure S2: Genus and species identity of isolates (n=53) from PCA, RCA and MRS agar media for food contact surface swab samples obtained from the cooked chicken slicer.
